# Supplementary material for: Investigation and Comparison of Active and Passive Encapsulation Methods for Loading Proteins into Liposomes
Source: MDPI journal article supplement (doi:10.3390/ijms241713542), 2023-08-31
Supplement: s1 [file s1]

SUPPLEMENTARY DATA

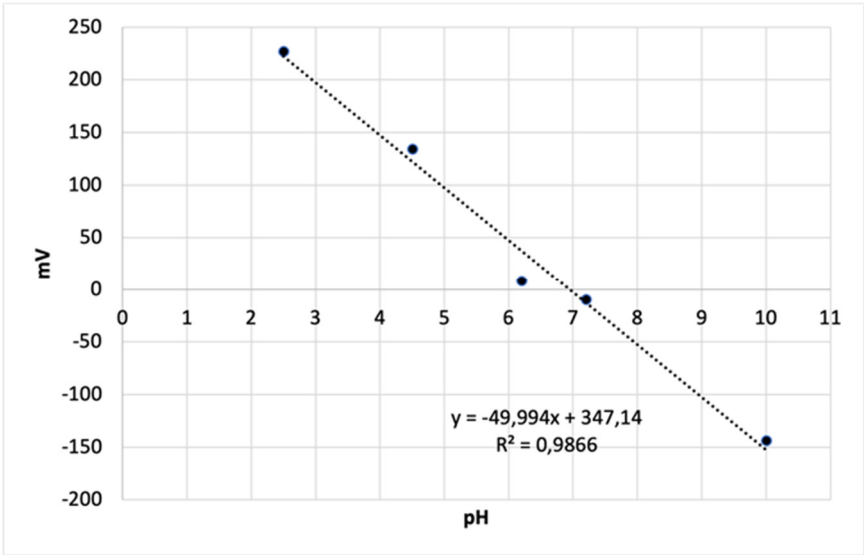

**Figure S1.** PE:DSPC:Chol liposomes surface charge in different aqueous media, as evaluated on batch #PM9.

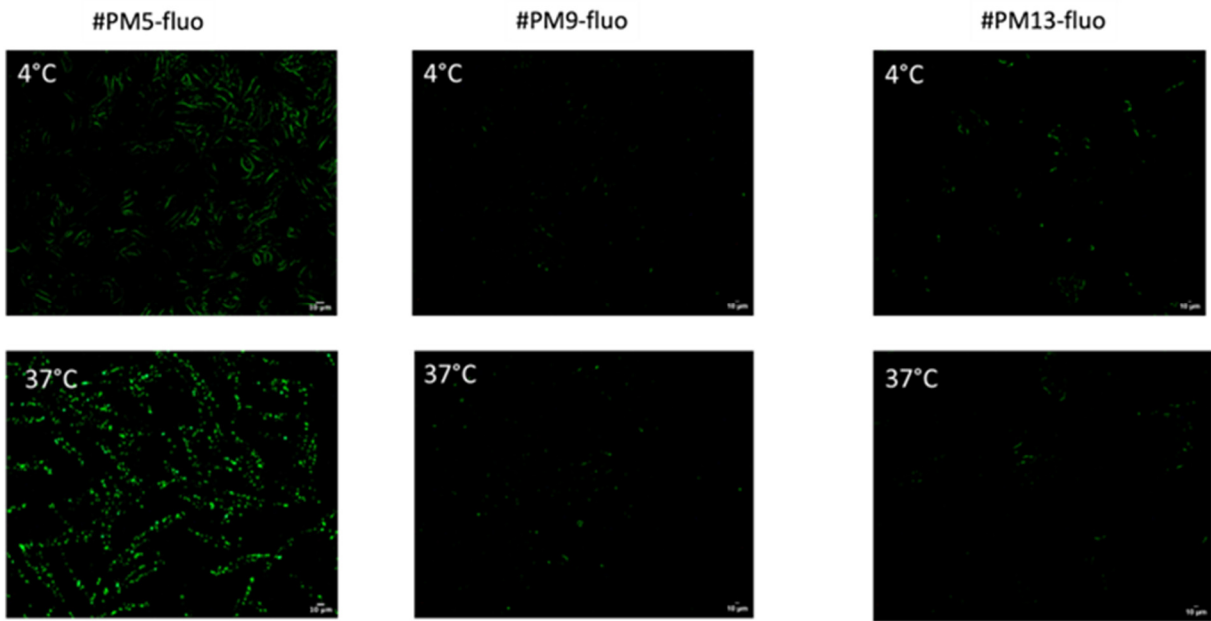

**Figure S2:** cellular uptake 10X of batches #PM5-fluo, #PM9-fluo and #PM13-fluo after 4h at 4°C and 37°C.
